# Supplementary material for: An effectiveness-implementation hybrid type 1 trial assessing the impact of group versus individual antenatal care on maternal and infant outcomes in Malawi
Source: Springer Nature journal article supplement (doi:10.1186/s12889-020-8276-x), 2020-02-10
Supplement: MOESM3 [file 17666776]

## The 3-Step Implementation Model Benchmarks (Prepare, Rollout, and Sustain)

| Group Care Circles Quarterly Benchmarks: PREPARE                                                                                                                           |                              |                             |  |
|----------------------------------------------------------------------------------------------------------------------------------------------------------------------------|------------------------------|-----------------------------|--|
| <b>Health Facility:</b>                                                                                                                                                    | <b>Today's date:</b>         |                             |  |
| <b>Reporting Quarter (3 months):</b>                                                                                                                                       | <b>Completed by:</b>         |                             |  |
| <b>1.</b> Was the health facility sensitized to Group Care Circles?                                                                                                        | <input type="checkbox"/> YES | <input type="checkbox"/> NO |  |
| <b>2.</b> Did co-facilitators (midwives/nurses and community volunteers, able to read Chichewa), attend a Care Circles training workshop?                                  | <input type="checkbox"/> YES | <input type="checkbox"/> NO |  |
| <b>2a.</b> In total, how many midwives/nurses are available for Care Circles?                                                                                              |                              |                             |  |
| <b>2b.</b> In total, how many community volunteers are available for Care Circles?                                                                                         |                              |                             |  |
| <b>3.</b> Are administrators supportive of Group Care Circles?                                                                                                             | <input type="checkbox"/> YES | <input type="checkbox"/> NO |  |
| <b>3a.</b> Describe the ways that administrators are and are not supportive:                                                                                               |                              |                             |  |
| <b>4.</b> Did you meet with a KCN consultant to initiate implementation planning?                                                                                          | <input type="checkbox"/> YES | <input type="checkbox"/> NO |  |
| <b>5.</b> Was a Care Circles room identified and reserved?                                                                                                                 | <input type="checkbox"/> YES | <input type="checkbox"/> NO |  |
| <b>6.</b> Was a Care Circles coordinating team was formed?                                                                                                                 | <input type="checkbox"/> YES | <input type="checkbox"/> NO |  |
| <b>6a.</b> In total, how many people are on the team?                                                                                                                      |                              |                             |  |
| <b>7.</b> Did the coordinating team met at least one time to create the rollout plan?                                                                                      | <input type="checkbox"/> YES | <input type="checkbox"/> NO |  |
| <b>7a.</b> In total, how many did the team meet?                                                                                                                           |                              |                             |  |
| <b>8.</b> Was the rollout plan shared and approved by the health facility?                                                                                                 | <input type="checkbox"/> YES | <input type="checkbox"/> NO |  |
| <b>9.</b> Did the coordinating team setup a Care Circles schedule that ensures continuity of care (the same co-facilitators at each group)?                                | <input type="checkbox"/> YES | <input type="checkbox"/> NO |  |
| <b>10.</b> Was the first Care Circles group established? In other words, were 8-12 women of similar gestational ages recruited and given the dates for all group meetings? | <input type="checkbox"/> YES | <input type="checkbox"/> NO |  |
| <b>10a.</b> What is the date of the first Care Circles meeting?                                                                                                            |                              |                             |  |

| Group Care Circles Quarterly Benchmarks: ROLLOUT                                                                     |  |                              |                             |
|----------------------------------------------------------------------------------------------------------------------|--|------------------------------|-----------------------------|
| Health Facility:                                                                                                     |  | Today's date:                |                             |
| Reporting Quarter (3 months):                                                                                        |  | Completed by:                |                             |
| A. How many groups fully completed care (all meetings) <b>this quarter</b> ?                                         |  |                              |                             |
| B. Did new clinic leaders & staff join the health facility? <input type="checkbox"/> Yes <input type="checkbox"/> No |  |                              |                             |
| 1. Are administrators supporting Group Care Circles?                                                                 |  | <input type="checkbox"/> YES | <input type="checkbox"/> NO |
| 1a. Describe the ways that administrators are or are not supportive:                                                 |  |                              |                             |
| 2. Is everyone, including the new leaders and staff, sensitized to Care Circles?                                     |  | <input type="checkbox"/> YES | <input type="checkbox"/> NO |
| 3. Does your health facility have adequate numbers of trained co-facilitators?                                       |  | <input type="checkbox"/> YES | <input type="checkbox"/> NO |
| 5a. In total, how many midwives/nurses are available for Care Circles?                                               |  |                              |                             |
| 5b. In total, how many community volunteers are available for Care Circles?                                          |  |                              |                             |
| 5c. In total, how many <b>new</b> facilitators were trained <b>this quarter</b> ?                                    |  |                              |                             |
| 4. Did the coordinating team meet at least once <b>this quarter</b> ?                                                |  | <input type="checkbox"/> YES | <input type="checkbox"/> NO |
| 6a. In total, how many times did the team meet <b>this quarter</b> ?                                                 |  |                              |                             |
| 5. Did you make plans to rollout new groups <b>this quarter</b> ?                                                    |  | <input type="checkbox"/> YES | <input type="checkbox"/> NO |
| 7a. How many new groups did you <b>plan</b> to offer <b>this quarter</b> ?                                           |  |                              |                             |
| 7b. Is this number more, the same, or less than last quarter?                                                        |  |                              |                             |
| 6. Did you form new ANC Care Circles <b>this quarter</b> ?                                                           |  | <input type="checkbox"/> YES | <input type="checkbox"/> NO |
| 8a. In total, how many <b>new</b> ANC Care Circles were formed?                                                      |  |                              |                             |
| 8b. If no new groups were formed, <b>please explain</b> :                                                            |  |                              |                             |
| 7. Did any Care Circles end prematurely <b>this quarter</b> ?                                                        |  | <input type="checkbox"/> YES | <input type="checkbox"/> NO |
| 9a. How many Care Circles ended prematurely?                                                                         |  |                              |                             |
| 9b. If Care Circles ended prematurely, <b>please explain</b> :                                                       |  |                              |                             |
| 8. Did coordinators collect and review self-assessment forms?                                                        |  | <input type="checkbox"/> YES | <input type="checkbox"/> NO |
| 8a. How many self-evaluation forms were collected?                                                                   |  |                              |                             |
| 8b. How many forms have a score above <b>13</b> ?                                                                    |  |                              |                             |
| 8c. Calculate the percentage of forms with a score above 13 ( $8b \div 8a$ )                                         |  |                              |                             |
| 8d. How many self-evaluation forms are missing?                                                                      |  |                              |                             |
| 9. Were Care Circles updates presented regularly at health facility meetings?                                        |  | <input type="checkbox"/> YES | <input type="checkbox"/> NO |
| 10. Does your health facility plan to continue offering Care Circles?                                                |  | <input type="checkbox"/> YES | <input type="checkbox"/> NO |

**Group Care Circles Quarterly Benchmarks: SUSTAINING**

|                                                                                                              |                              |                             |  |
|--------------------------------------------------------------------------------------------------------------|------------------------------|-----------------------------|--|
| <b>Health Facility:</b>                                                                                      |                              | <b>Today's date:</b>        |  |
| <b>Reporting Quarter (3 months):</b>                                                                         |                              | <b>Completed by:</b>        |  |
| <b>A. How many groups fully completed care (all meetings) <u>this quarter</u>?</b>                           |                              |                             |  |
| <b>1. Is everyone, including the new leaders and staff, sensitized to Care Circles?</b>                      | <input type="checkbox"/> YES | <input type="checkbox"/> NO |  |
| <b>2. Does your health facility have adequate numbers of trained co-facilitators?</b>                        | <input type="checkbox"/> YES | <input type="checkbox"/> NO |  |
| <b>2a. In total</b> , how many midwives/nurses are available for Care Circles?                               |                              |                             |  |
| <b>2b. In total</b> , how many community volunteers are available?                                           |                              |                             |  |
| <b>2c. In total</b> , how many <b>new</b> facilitators were trained <b>this quarter</b> ?                    |                              |                             |  |
| <b>3. Did you roll out new groups <u>this quarter</u>?</b>                                                   | <input type="checkbox"/> YES | <input type="checkbox"/> NO |  |
| <b>3a. If NO</b> , please explain:                                                                           |                              |                             |  |
| <b>4. Did coordinators collect and review self-assessment forms?</b>                                         | <input type="checkbox"/> YES | <input type="checkbox"/> NO |  |
| <b>4a.</b> How many self-evaluation forms were collected?                                                    |                              |                             |  |
| <b>4b.</b> How many forms had a score above 13.0?                                                            |                              |                             |  |
| <b>4c.</b> How many self-evaluation forms are missing?                                                       |                              |                             |  |
| <b>4d. Calculate</b> the percentage of forms with a score above 13.0 ( <b>8b ÷ 8a</b> )                      |                              |                             |  |
| <b>4e. See 4d</b> , were 90% (or more) of groups offered with high fidelity?                                 |                              |                             |  |
| <b>5. Will your health facility continue to offer Group ANC Care Circles and enroll women in new groups?</b> | <input type="checkbox"/> YES | <input type="checkbox"/> NO |  |
